# Supplementary material for: Ecogeographic Drivers of the Spatial Spread of Highly Pathogenic Avian Influenza Outbreaks in Europe and the United States, 2016–Early 2022
Source: MDPI journal article supplement (doi:10.3390/ijerph20116030), 2023-06-01
Supplement: s1 [file s1]

## Supplementary materials

**Supplementary table S1:** Downsampled dataset of 378 H5Nx HA sequences, including sequences from H5Nx outbreak in North America, December 2021- May 2022 (n=170), unpublished Massachusetts sequences from outbreak in North America acquired by our group in May 2022 (n=15), publicly available H5Nx sequences from Europe 2016-2022 (n=160), and historic sequences (n=33) resulting in a total of 380 H5 HA sequences included in the analysis.

| Accession number | Source                | Date       | Species        | Country        | Continent | Location (incl masked) | Country groupings |
|------------------|-----------------------|------------|----------------|----------------|-----------|------------------------|-------------------|
| MH819124         | IRD_2.3.4.4_2014_2022 | 01/01/2017 | Mute_swan      | United_Kingdom | Europe    | England                | Northern_Europe   |
| MN874967         | IRD_2.3.4.4_2014_2022 | 01/02/2017 | Duck           | France         | Europe    | France                 | Central_Europe    |
| MT027086         | IRD_2.3.4.4_2014_2022 | 01/03/2020 | Chicken        | Slovakia       | Europe    | Slovakia               | Central_Europe    |
| MN874970         | IRD_2.3.4.4_2014_2022 | 01/04/2017 | Duck           | France         | Europe    | France                 | Central_Europe    |
| MN874975         | IRD_2.3.4.4_2014_2022 | 01/04/2017 | Chicken        | France         | Europe    | France                 | Central_Europe    |
| MT781495         | IRD_2.3.4.4_2014_2022 | 01/04/2019 | Common_buzzard | Denmark        | Europe    | Denmark                | Northern_Europe   |
| KY621534         | IRD_2.3.4.4_2014_2022 | 01/06/2017 | Chicken        | Czech_Republic | Europe    | Czech_Republic         | Central_Europe    |
| MN874981         | IRD_2.3.4.4_2014_2022 | 01/07/2017 | Chicken        | France         | Europe    | France                 | Central_Europe    |
| MN875116         | IRD_2.3.4.4_2014_2022 | 01/10/2017 | Swan           | France         | Europe    | France                 | Central_Europe    |
| MN874988         | IRD_2.3.4.4_2014_2022 | 01/11/2017 | Turkey         | France         | Europe    | France                 | Central_Europe    |
| MN874989         | IRD_2.3.4.4_2014_2022 | 01/11/2017 | Turkey         | France         | Europe    | France                 | Central_Europe    |
| OM943965         | IRD_2.3.4.4_2014_2022 | 01/11/2022 | Greylag_goose  | Spain          | Europe    | Spain                  | Southern_Europe   |
| OM943964         | IRD_2.3.4.4_2014_2022 | 01/11/2022 | Grey_heron     | Spain          | Europe    | Spain                  | Southern_Europe   |
| MH819120         | IRD_2.3.4.4_2014_2022 | 01/13/2017 | Mute_swan      | United_Kingdom | Europe    | England                | Northern_Europe   |
| MH819127         | IRD_2.3.4.4_2014_2022 | 01/13/2017 | Mute_swan      | United_Kingdom | Europe    | England                | Northern_Europe   |
| MN874998         | IRD_2.3.4.4_2014_2022 | 01/13/2017 | Chicken        | France         | Europe    | France                 | Central_Europe    |
| OM943967         | IRD_2.3.4.4_2014_2022 | 01/14/2022 | Greylag_goose  | Spain          | Europe    | Spain                  | Southern_Europe   |
| MH819119         | IRD_2.3.4.4_2014_2022 | 01/15/2017 | Mute_swan      | United_Kingdom | Europe    | England                | Northern_Europe   |
| OM943966         | IRD_2.3.4.4_2014_2022 | 01/15/2022 | Turkey         | Spain          | Europe    | Spain                  | Southern_Europe   |
| MN875005         | IRD_2.3.4.4_2014_2022 | 01/16/2017 | Chicken        | France         | Europe    | France                 | Central_Europe    |
| MN875009         | IRD_2.3.4.4_2014_2022 | 01/16/2017 | Chicken        | France         | Europe    | France                 | Central_Europe    |
| MN874996         | IRD_2.3.4.4_2014_2022 | 01/16/2017 | Duck           | France         | Europe    | France                 | Central_Europe    |
| MN875006         | IRD_2.3.4.4_2014_2022 | 01/17/2017 | Chicken        | France         | Europe    | France                 | Central_Europe    |
| MN875007         | IRD_2.3.4.4_2014_2022 | 01/17/2017 | Guinea_fowl    | France         | Europe    | France                 | Central_Europe    |
| MN875010         | IRD_2.3.4.4_2014_2022 | 01/17/2017 | Chicken        | France         | Europe    | France                 | Central_Europe    |
| MN875004         | IRD_2.3.4.4_2014_2022 | 01/19/2017 | Common_buzzard | France         | Europe    | France                 | Central_Europe    |
| MN875015         | IRD_2.3.4.4_2014_2022 | 01/20/2017 | Duck           | France         | Europe    | France                 | Central_Europe    |
| MN875012         | IRD_2.3.4.4_2014_2022 | 01/21/2017 | Kestelfalcon   | France         | Europe    | France                 | Central_Europe    |
| MN875014         | IRD_2.3.4.4_2014_2022 | 01/23/2017 | Duck           | France         | Europe    | France                 | Central_Europe    |
| MH819128         | IRD_2.3.4.4_2014_2022 | 01/24/2017 | Mute_swan      | United_Kingdom | Europe    | England                | Northern_Europe   |
| MN875017         | IRD_2.3.4.4_2014_2022 | 01/24/2017 | Chicken        | France         | Europe    | France                 | Central_Europe    |
| MN875025         | IRD_2.3.4.4_2014_2022 | 01/24/2017 | Chicken        | France         | Europe    | France                 | Central_Europe    |
| MN875018         | IRD_2.3.4.4_2014_2022 | 01/25/2017 | Duck           | France         | Europe    | France                 | Central_Europe    |
| MN875022         | IRD_2.3.4.4_2014_2022 | 01/27/2017 | Common_buzzard | France         | Europe    | France                 | Central_Europe    |
| MN875024         | IRD_2.3.4.4_2014_2022 | 01/27/2017 | Chicken        | France         | Europe    | France                 | Central_Europe    |

|          |                       |            |                    |                |        |          |                 |
|----------|-----------------------|------------|--------------------|----------------|--------|----------|-----------------|
| MZ166240 | IRD_2.3.4.4_2014_2022 | 01/28/2021 | Mule_duck          | France         | Europe | France   | Central_Europe  |
| OM943970 | IRD_2.3.4.4_2014_2022 | 01/28/2022 | White_stork        | Spain          | Europe | Spain    | Southern_Europe |
| OM943968 | IRD_2.3.4.4_2014_2022 | 01/28/2022 | Cattle_egret       | Spain          | Europe | Spain    | Southern_Europe |
| OM943969 | IRD_2.3.4.4_2014_2022 | 01/28/2022 | Grey_heron         | Spain          | Europe | Spain    | Southern_Europe |
| MN875030 | IRD_2.3.4.4_2014_2022 | 01/31/2017 | Duck               | France         | Europe | France   | Central_Europe  |
| MH819118 | IRD_2.3.4.4_2014_2022 | 01/2017    | Mute_swan          | United_Kingdom | Europe | England  | Northern_Europe |
| MH819117 | IRD_2.3.4.4_2014_2022 | 01/2017    | Mute_swan          | United_Kingdom | Europe | England  | Northern_Europe |
| MF073901 | IRD_2.3.4.4_2014_2022 | 02/01/2017 | Chicken            | Belgium        | Europe | Belgium  | Northern_Europe |
| MT198989 | IRD_2.3.4.4_2014_2022 | 02/01/2017 | Guinea_fowl        | Belgium        | Europe | Belgium  | Northern_Europe |
| MN875035 | IRD_2.3.4.4_2014_2022 | 02/03/2017 | Duck               | France         | Europe | France   | Central_Europe  |
| OM943977 | IRD_2.3.4.4_2014_2022 | 02/03/2022 | White_stork        | Spain          | Europe | Spain    | Southern_Europe |
| OM943976 | IRD_2.3.4.4_2014_2022 | 02/04/2022 | Greylag_goose      | Spain          | Europe | Spain    | Southern_Europe |
| MW026103 | IRD_2.3.4.4_2014_2022 | 02/06/2017 | Goose              | Denmark        | Europe | Denmark  | Northern_Europe |
| OM943972 | IRD_2.3.4.4_2014_2022 | 02/06/2022 | Turkey             | Spain          | Europe | Spain    | Southern_Europe |
| MN875039 | IRD_2.3.4.4_2014_2022 | 02/07/2017 | Duck               | France         | Europe | France   | Central_Europe  |
| MF073909 | IRD_2.3.4.4_2014_2022 | 02/08/2017 | Peacock            | Belgium        | Europe | Belgium  | Northern_Europe |
| MN875046 | IRD_2.3.4.4_2014_2022 | 02/08/2017 | Common_buzzard     | France         | Europe | France   | Central_Europe  |
| OM943974 | IRD_2.3.4.4_2014_2022 | 02/08/2022 | Turkey             | Spain          | Europe | Spain    | Southern_Europe |
| OM943975 | IRD_2.3.4.4_2014_2022 | 02/08/2022 | Turkey             | Spain          | Europe | Spain    | Southern_Europe |
| MT781554 | IRD_2.3.4.4_2014_2022 | 02/09/2018 | White_tailed_eagle | Denmark        | Europe | Denmark  | Northern_Europe |
| OM943973 | IRD_2.3.4.4_2014_2022 | 02/09/2022 | White_stork        | Spain          | Europe | Spain    | Southern_Europe |
| OM943978 | IRD_2.3.4.4_2014_2022 | 02/09/2022 | Turkey             | Spain          | Europe | Spain    | Southern_Europe |
| MN875054 | IRD_2.3.4.4_2014_2022 | 02/10/2017 | Duck               | France         | Europe | France   | Central_Europe  |
| MN875056 | IRD_2.3.4.4_2014_2022 | 02/11/2017 | Chicken            | France         | Europe | France   | Central_Europe  |
| MN875058 | IRD_2.3.4.4_2014_2022 | 02/11/2017 | Duck               | France         | Europe | France   | Central_Europe  |
| OM943979 | IRD_2.3.4.4_2014_2022 | 02/11/2022 | Chicken            | Spain          | Europe | Spain    | Southern_Europe |
| MN875062 | IRD_2.3.4.4_2014_2022 | 02/12/2017 | Chicken            | France         | Europe | France   | Central_Europe  |
| MT781602 | IRD_2.3.4.4_2014_2022 | 02/12/2018 | White_tailed_eagle | Denmark        | Europe | Denmark  | Northern_Europe |
| MN875060 | IRD_2.3.4.4_2014_2022 | 02/13/2017 | Chicken            | France         | Europe | France   | Central_Europe  |
| MT781546 | IRD_2.3.4.4_2014_2022 | 02/13/2018 | White_tailed_eagle | Denmark        | Europe | Denmark  | Northern_Europe |
| MN875065 | IRD_2.3.4.4_2014_2022 | 02/14/2017 | Chicken            | France         | Europe | France   | Central_Europe  |
| OM943982 | IRD_2.3.4.4_2014_2022 | 02/14/2022 | White_stork        | Spain          | Europe | Spain    | Southern_Europe |
| OM943981 | IRD_2.3.4.4_2014_2022 | 02/14/2022 | Chicken            | Spain          | Europe | Spain    | Southern_Europe |
| OM943980 | IRD_2.3.4.4_2014_2022 | 02/14/2022 | Turkey             | Spain          | Europe | Spain    | Southern_Europe |
| OM943983 | IRD_2.3.4.4_2014_2022 | 02/14/2022 | Chicken            | Spain          | Europe | Spain    | Southern_Europe |
| MN875075 | IRD_2.3.4.4_2014_2022 | 02/15/2017 | Duck               | France         | Europe | France   | Central_Europe  |
| OM943986 | IRD_2.3.4.4_2014_2022 | 02/15/2022 | Turkey             | Spain          | Europe | Spain    | Southern_Europe |
| OM943987 | IRD_2.3.4.4_2014_2022 | 02/16/2022 | Chicken            | Spain          | Europe | Spain    | Southern_Europe |
| OM943985 | IRD_2.3.4.4_2014_2022 | 02/17/2022 | Chicken            | Spain          | Europe | Spain    | Southern_Europe |
| OM943984 | IRD_2.3.4.4_2014_2022 | 02/17/2022 | Greylag_goose      | Spain          | Europe | Spain    | Southern_Europe |
| MZ166316 | IRD_2.3.4.4_2014_2022 | 02/20/2021 | Mule_duck          | France         | Europe | France   | Central_Europe  |
| MF073917 | IRD_2.3.4.4_2014_2022 | 02/21/2017 | Mute_swan          | Belgium        | Europe | Belgium  | Northern_Europe |
| MN875082 | IRD_2.3.4.4_2014_2022 | 02/21/2017 | Chicken            | France         | Europe | France   | Central_Europe  |
| MT272361 | IRD_2.3.4.4_2014_2022 | 02/21/2020 | Chicken            | Bulgaria       | Europe | Bulgaria | Southern_Europe |
| MN875084 | IRD_2.3.4.4_2014_2022 | 02/24/2017 | Duck               | France         | Europe | France   | Central_Europe  |

|          |                       |            |                    |                |        |                |                 |
|----------|-----------------------|------------|--------------------|----------------|--------|----------------|-----------------|
| MN875086 | IRD_2.3.4.4_2014_2022 | 02/25/2017 | Chicken            | France         | Europe | France         | Central_Europe  |
| MN875087 | IRD_2.3.4.4_2014_2022 | 02/25/2017 | Chicken            | France         | Europe | France         | Central_Europe  |
| MH107207 | IRD_2.3.4.4_2014_2022 | 02/27/2017 | Mallard            | Belgium        | Europe | Belgium        | Northern_Europe |
| MN875091 | IRD_2.3.4.4_2014_2022 | 02/27/2017 | Duck               | France         | Europe | France         | Central_Europe  |
| MN875092 | IRD_2.3.4.4_2014_2022 | 02/28/2017 | Chicken            | France         | Europe | France         | Central_Europe  |
| MN875093 | IRD_2.3.4.4_2014_2022 | 02/28/2017 | Chicken            | France         | Europe | France         | Central_Europe  |
| MN875094 | IRD_2.3.4.4_2014_2022 | 03/01/2017 | Duck               | France         | Europe | France         | Central_Europe  |
| MK494923 | IRD_2.3.4.4_2014_2022 | 03/02/2017 | Goose              | Spain          | Europe | Spain          | Southern_Europe |
| MN875096 | IRD_2.3.4.4_2014_2022 | 03/02/2017 | Chicken            | France         | Europe | France         | Central_Europe  |
| MW026080 | IRD_2.3.4.4_2014_2022 | 03/03/2017 | Common_buzzard     | Denmark        | Europe | Denmark        | Northern_Europe |
| MN875100 | IRD_2.3.4.4_2014_2022 | 03/04/2017 | Duck               | France         | Europe | France         | Central_Europe  |
| MN875099 | IRD_2.3.4.4_2014_2022 | 03/07/2017 | Chicken            | France         | Europe | France         | Central_Europe  |
| MT272360 | IRD_2.3.4.4_2014_2022 | 03/09/2020 | Chicken            | Bulgaria       | Europe | Bulgaria       | Southern_Europe |
| MT781570 | IRD_2.3.4.4_2014_2022 | 03/14/2018 | White_tailed_eagle | Denmark        | Europe | Denmark        | Northern_Europe |
| MT781562 | IRD_2.3.4.4_2014_2022 | 03/16/2018 | White_tailed_eagle | Denmark        | Europe | Denmark        | Northern_Europe |
| MN875102 | IRD_2.3.4.4_2014_2022 | 03/18/2017 | Duck               | France         | Europe | France         | Central_Europe  |
| MH107215 | IRD_2.3.4.4_2014_2022 | 03/21/2017 | Mute_swan          | Belgium        | Europe | Belgium        | Northern_Europe |
| MN875103 | IRD_2.3.4.4_2014_2022 | 03/21/2017 | Chicken            | France         | Europe | France         | Central_Europe  |
| MN875105 | IRD_2.3.4.4_2014_2022 | 03/21/2017 | Duck               | France         | Europe | France         | Central_Europe  |
| MH107223 | IRD_2.3.4.4_2014_2022 | 03/23/2017 | Common_buzzard     | Belgium        | Europe | Belgium        | Northern_Europe |
| MW026072 | IRD_2.3.4.4_2014_2022 | 03/23/2017 | Common_buzzard     | Denmark        | Europe | Denmark        | Northern_Europe |
| MN875112 | IRD_2.3.4.4_2014_2022 | 03/26/2017 | Swan               | France         | Europe | France         | Central_Europe  |
| MT781482 | IRD_2.3.4.4_2014_2022 | 03/26/2018 | Black_headed_gull  | Denmark        | Europe | Denmark        | Northern_Europe |
| MT781519 | IRD_2.3.4.4_2014_2022 | 03/27/2018 | Mute_swan          | Denmark        | Europe | Denmark        | Northern_Europe |
| MT781591 | IRD_2.3.4.4_2014_2022 | 03/27/2019 | White_tailed_eagle | Denmark        | Europe | Denmark        | Northern_Europe |
| MT781586 | IRD_2.3.4.4_2014_2022 | 04/02/2018 | White_tailed_eagle | Denmark        | Europe | Denmark        | Northern_Europe |
| MT781578 | IRD_2.3.4.4_2014_2022 | 04/03/2018 | White_tailed_eagle | Denmark        | Europe | Denmark        | Northern_Europe |
| MT781490 | IRD_2.3.4.4_2014_2022 | 04/18/2018 | Common_buzzard     | Denmark        | Europe | Denmark        | Northern_Europe |
| MF425637 | IRD_2.3.4.4_2014_2022 | 06/10/2017 | Chicken            | Belgium        | Europe | Belgium        | Northern_Europe |
| MH107199 | IRD_2.3.4.4_2014_2022 | 06/14/2017 | Guinea_fowl        | Belgium        | Europe | Belgium        | Northern_Europe |
| MF425636 | IRD_2.3.4.4_2014_2022 | 06/15/2017 | Chicken            | Belgium        | Europe | Belgium        | Northern_Europe |
| MH107191 | IRD_2.3.4.4_2014_2022 | 06/15/2017 | Chicken            | Belgium        | Europe | Belgium        | Northern_Europe |
| MN875115 | IRD_2.3.4.4_2014_2022 | 06/23/2017 | Swan               | France         | Europe | France         | Central_Europe  |
| MN875107 | IRD_2.3.4.4_2014_2022 | 06/26/2017 | Chicken            | France         | Europe | France         | Central_Europe  |
| MT781503 | IRD_2.3.4.4_2014_2022 | 07/11/2018 | Eider              | Denmark        | Europe | Denmark        | Northern_Europe |
| MT781511 | IRD_2.3.4.4_2014_2022 | 08/12/2018 | Mute_swan          | Denmark        | Europe | Denmark        | Northern_Europe |
| MT781473 | IRD_2.3.4.4_2014_2022 | 08/27/2018 | Mallard            | Denmark        | Europe | Denmark        | Northern_Europe |
| MT781472 | IRD_2.3.4.4_2014_2022 | 08/27/2018 | Mallard            | Denmark        | Europe | Denmark        | Northern_Europe |
| MT781527 | IRD_2.3.4.4_2014_2022 | 08/30/2018 | Pheasant           | Denmark        | Europe | Denmark        | Northern_Europe |
| MT781470 | IRD_2.3.4.4_2014_2022 | 09/03/2018 | Eider              | Denmark        | Europe | Denmark        | Northern_Europe |
| MT781474 | IRD_2.3.4.4_2014_2022 | 09/03/2018 | Mute_swan          | Denmark        | Europe | Denmark        | Northern_Europe |
| OL638145 | IRD_2.3.4.4_2014_2022 | 09/27/2021 | Goose              | Czech_Republic | Europe | Czech_Republic | Central_Europe  |
| OL636392 | IRD_2.3.4.4_2014_2022 | 09/27/2021 | Goose              | Czech_Republic | Europe | Czech_Republic | Central_Europe  |
| MN708201 | IRD_2.3.4.4_2014_2022 | 11/07/2016 | Tufted_duck        | Denmark        | Europe | Denmark        | Northern_Europe |
| MW026128 | IRD_2.3.4.4_2014_2022 | 11/07/2016 | Tufted_duck        | Denmark        | Europe | Denmark        | Northern_Europe |

|          |                        |            |                         |                |        |         |                 |
|----------|------------------------|------------|-------------------------|----------------|--------|---------|-----------------|
| MW026112 | IRD_2.3.4.4_2014_2022  | 11/16/2016 | Great_black_backed_gull | Denmark        | Europe | Denmark | Northern_Europe |
| MW026088 | IRD_2.3.4.4_2014_2022  | 11/16/2016 | Common_gull             | Denmark        | Europe | Denmark | Northern_Europe |
| MW026120 | IRD_2.3.4.4_2014_2022  | 11/19/2016 | Mute_swan               | Denmark        | Europe | Denmark | Northern_Europe |
| MW026096 | IRD_2.3.4.4_2014_2022  | 11/19/2017 | Duck                    | Denmark        | Europe | Denmark | Northern_Europe |
| MN875111 | IRD_2.3.4.4_2014_2022  | 11/23/2017 | Gull                    | France         | Europe | France  | Central_Europe  |
| MH819856 | IRD_2.3.4.4_2014_2022  | 11/24/2016 | Mallard                 | Hungary        | Europe | Hungary | Central_Europe  |
| MN874912 | IRD_2.3.4.4_2014_2022  | 12/01/2016 | Duck                    | France         | Europe | France  | Central_Europe  |
| MN874914 | IRD_2.3.4.4_2014_2022  | 12/03/2016 | Duck                    | France         | Europe | France  | Central_Europe  |
| MN874918 | IRD_2.3.4.4_2014_2022  | 12/06/2016 | Duck                    | France         | Europe | France  | Central_Europe  |
| MZ166252 | IRD_2.3.4.4_2014_2022  | 12/06/2020 | Mute_duck               | France         | Europe | France  | Central_Europe  |
| MN874921 | IRD_2.3.4.4_2014_2022  | 12/09/2016 | Duck                    | France         | Europe | France  | Central_Europe  |
| MZ166260 | IRD_2.3.4.4_2014_2022  | 12/10/2020 | Mute_duck               | France         | Europe | France  | Central_Europe  |
| MN874928 | IRD_2.3.4.4_2014_2022  | 12/12/2016 | Duck                    | France         | Europe | France  | Central_Europe  |
| MZ166276 | IRD_2.3.4.4_2014_2022  | 12/13/2020 | Mute_duck               | France         | Europe | France  | Central_Europe  |
| MN874937 | IRD_2.3.4.4_2014_2022  | 12/15/2016 | Duck                    | France         | Europe | France  | Central_Europe  |
| MZ166239 | IRD_2.3.4.4_2014_2022  | 12/15/2020 | Mute_duck               | France         | Europe | France  | Central_Europe  |
| MN874953 | IRD_2.3.4.4_2014_2022  | 12/16/2016 | Duck                    | France         | Europe | France  | Central_Europe  |
| MN875109 | IRD_2.3.4.4_2014_2022  | 12/18/2016 | Eurasian_wigeon         | France         | Europe | France  | Central_Europe  |
| MZ166284 | IRD_2.3.4.4_2014_2022  | 12/21/2020 | Mule_duck               | France         | Europe | France  | Central_Europe  |
| MN874943 | IRD_2.3.4.4_2014_2022  | 12/22/2016 | Duck                    | France         | Europe | France  | Central_Europe  |
| MT781535 | IRD_2.3.4.4_2014_2022  | 12/22/2018 | White_tailed_eagle      | Denmark        | Europe | Denmark | Northern_Europe |
| OM943962 | IRD_2.3.4.4_2014_2022  | 12/22/2021 | Mute_swan               | Spain          | Europe | Spain   | Southern_Europe |
| OM943963 | IRD_2.3.4.4_2014_2022  | 12/22/2021 | White_stork             | Spain          | Europe | Spain   | Southern_Europe |
| MN874954 | IRD_2.3.4.4_2014_2022  | 12/25/2016 | Duck                    | France         | Europe | France  | Central_Europe  |
| MZ166292 | IRD_2.3.4.4_2014_2022  | 12/26/2020 | Mule_duck               | France         | Europe | France  | Central_Europe  |
| MN874956 | IRD_2.3.4.4_2014_2022  | 12/27/2016 | Duck                    | France         | Europe | France  | Central_Europe  |
| MZ166300 | IRD_2.3.4.4_2014_2022  | 12/27/2020 | Mule_duck               | France         | Europe | France  | Central_Europe  |
| MN875108 | IRD_2.3.4.4_2014_2022  | 12/28/2016 | Chicken                 | France         | Europe | France  | Central_Europe  |
| MN874962 | IRD_2.3.4.4_2014_2022  | 12/29/2016 | Duck                    | France         | Europe | France  | Central_Europe  |
| MH819126 | IRD_2.3.4.4_2014_2022  | 12/30/2016 | Mute_swan               | United_Kingdom | Europe | England | Northern_Europe |
| MH819121 | IRD_2.3.4.4_2014_2022  | 12/31/2016 | Mute_swan               | United_Kingdom | Europe | England | Northern_Europe |
| MH819123 | IRD_2.3.4.4_2014_2022  | 12/31/2016 | Mute_swan               | United_Kingdom | Europe | England | Northern_Europe |
| MH819125 | IRD_2.3.4.4_2014_2022  | 12/31/2016 | Mute_swan               | United_Kingdom | Europe | England | Northern_Europe |
| MH819122 | IRD_2.3.4.4_2014_2022  | 12/31/2016 | Mute_swan               | United_Kingdom | Europe | England | Northern_Europe |
| MN874968 | IRD_2.3.4.4_2014_2022  | 12/31/2016 | Duck                    | France         | Europe | France  | Central_Europe  |
| EU743301 | IRD, Historic sequence | 1979       | Turkey                  | USA            | USA    | mask    | mask            |
| AB558457 | IRD, Historic sequence | 1981       | Turkey                  | USA            | USA    | mask    | mask            |
| CY178062 | IRD, Historic sequence | 1982       | Mallard                 | USA            | USA    | mask    | mask            |
| KP674447 | IRD, Historic sequence | 1985       | Chicken                 | USA            | USA    | mask    | mask            |
| EU743071 | IRD, Historic sequence | 1987       | Turkey                  | USA            | USA    | mask    | mask            |
| CY014872 | IRD, Historic sequence | 1988       | Black_duck              | USA            | USA    | mask    | mask            |
| CY005926 | IRD, Historic sequence | 1989       | Herring_gull            | USA            | USA    | mask    | mask            |
| KF435066 | IRD, Historic sequence | 1991       | Finch                   | USA            | USA    | mask    | mask            |
| EU182309 | IRD, Historic sequence | 1992       | Turkey                  | USA            | USA    | mask    | mask            |
| EU743019 | IRD, Historic sequence | 1993       | Chicken                 | USA            | USA    | mask    | mask            |

|                  |                        |            |                            |             |               |                |                        |
|------------------|------------------------|------------|----------------------------|-------------|---------------|----------------|------------------------|
| AF194990         | IRD, Historic sequence | 1997       | Chicken                    | Italy       | Europe        | mask           | mask                   |
| CY139689         | IRD, Historic sequence | 2000       | Mallard                    | USA         | USA           | mask           | mask                   |
| MH597212         | IRD, Historic sequence | 2003       | Ruddy_turnstone            | USA         | USA           | mask           | mask                   |
| GU050008         | IRD, Historic sequence | 2006       | Duck                       | USA         | USA           | mask           | mask                   |
| KF183616         | IRD, Historic sequence | 2007       | Mallard                    | Finland     | Finland       | mask           | mask                   |
| MF145713         | IRD, Historic sequence | 2008       | Mallard                    | Netherlands | Europe        | mask           | mask                   |
| CY047046         | IRD, Historic sequence | 2009       | Duck                       | France      | Europe        | mask           | mask                   |
| MF146146         | IRD, Historic sequence | 2010       | White_fronted_goose        | Netherlands | Netherlands   | mask           | mask                   |
| CY167192         | IRD, Historic sequence | 2012       | American_green_winged_teal | USA         | USA           | mask           | mask                   |
| CY176965         | IRD, Historic sequence | 2013       | Mallard                    | USA         | USA           | mask           | mask                   |
| KP739405         | IRD, Historic sequence | 2014       | Chicken                    | USA         | USA           | mask           | mask                   |
| GQ247849         | IRD, Historic sequence | 1980       | Turkey                     | Italy       | Europe        | mask           | mask                   |
| M18451           | IRD, Historic sequence | 1983       | Turkey                     | Ireland     | Europe        | mask           | mask                   |
| KM186131         | IRD, Historic sequence | 1984       | Duck                       | USA         | North_America | mask           | mask                   |
| EU743233         | IRD, Historic sequence | 1986       | Goose                      | USA         | North_America | mask           | mask                   |
| L46586           | IRD, Historic sequence | 1994       | Chicken                    | Mexico      | North_America | mask           | mask                   |
| AB558474         | IRD, Historic sequence | 1995       | Chicken                    | Mexico      | North_America | mask           | mask                   |
| OK205571         | IRD, Historic sequence | 1998       | Chicken                    | Guatemala   | North_America | mask           | mask                   |
| EF597269         | IRD, Historic sequence | 2002       | Mallard                    | Italy       | Europe        | mask           | mask                   |
| MH613314         | IRD, Historic sequence | 2004       | Laughing_gull              | USA         | USA           | mask           | mask                   |
| CY149348         | IRD, Historic sequence | 2011       | Great_black_backed_gull    | Iceland     | Europe        | mask           | mask                   |
| OK205827         | IRD, Historic sequence | 1996       | Chicken                    | Mexico      | North_America | mask           | mask                   |
| MZ019501         | IRD, Historic sequence | 1999       | Chicken                    | Belgium     | Europe        | mask           | mask                   |
| EPI_ISL_9869760  | GISAID_170_NA_Outbreak | 12/30/2021 | American_wigeon            | USA         | USA           | South_Carolina | Midwest & Mid-Atlantic |
| EPI_ISL_9876777  | GISAID_170_NA_Outbreak | 12/30/2021 | American_blue_winged_teal  | USA         | USA           | South_Carolina | Midwest & Mid-Atlantic |
| EPI_ISL_9880015  | GISAID_170_NA_Outbreak | 01/08/2022 | American_wigeon            | USA         | USA           | North_Carolina | Midwest & Mid-Atlantic |
| EPI_ISL_9880019  | GISAID_170_NA_Outbreak | 01/08/2022 | Mallard                    | USA         | USA           | North_Carolina | Midwest & Mid-Atlantic |
| EPI_ISL_9880021  | GISAID_170_NA_Outbreak | 01/08/2022 | Northern_pintail           | USA         | USA           | North_Carolina | Midwest & Mid-Atlantic |
| EPI_ISL_9880151  | GISAID_170_NA_Outbreak | 01/08/2022 | Gadwall                    | USA         | USA           | North_Carolina | Midwest & Mid-Atlantic |
| EPI_ISL_9880152  | GISAID_170_NA_Outbreak | 01/08/2022 | Northern_shoveler          | USA         | USA           | North_Carolina | Midwest & Mid-Atlantic |
| EPI_ISL_9880153  | GISAID_170_NA_Outbreak | 01/08/2022 | American_wigeon            | USA         | USA           | North_Carolina | Midwest & Mid-Atlantic |
| EPI_ISL_9909371  | GISAID_170_NA_Outbreak | 02/07/2022 | Turkey                     | USA         | USA           | Indiana        | Midwest & Mid-Atlantic |
| EPI_ISL_11628212 | GISAID_170_NA_Outbreak | 02/11/2022 | Chicken                    | USA         | USA           | Virginia       | Midwest & Mid-Atlantic |
| EPI_ISL_11628213 | GISAID_170_NA_Outbreak | 02/11/2022 | Chicken                    | USA         | USA           | Kentucky       | Midwest & Mid-Atlantic |
| EPI_ISL_11628214 | GISAID_170_NA_Outbreak | 02/11/2022 | Chicken                    | USA         | USA           | Kentucky       | Midwest & Mid-Atlantic |
| EPI_ISL_11628215 | GISAID_170_NA_Outbreak | 02/11/2022 | Chicken                    | USA         | USA           | Kentucky       | Midwest & Mid-Atlantic |
| EPI_ISL_11628216 | GISAID_170_NA_Outbreak | 12/02/2022 | Turkey                     | USA         | USA           | Kentucky       | Midwest & Mid-Atlantic |
| EPI_ISL_11628217 | GISAID_170_NA_Outbreak | 12/02/2022 | Turkey                     | USA         | USA           | Kentucky       | Midwest & Mid-Atlantic |
| EPI_ISL_11628218 | GISAID_170_NA_Outbreak | 02/14/2022 | Turkey                     | USA         | USA           | Indiana        | Midwest & Mid-Atlantic |
| EPI_ISL_11628219 | GISAID_170_NA_Outbreak | 02/14/2022 | Turkey                     | USA         | USA           | Indiana        | Midwest & Mid-Atlantic |
| EPI_ISL_11628220 | GISAID_170_NA_Outbreak | 02/14/2022 | Turkey                     | USA         | USA           | Indiana        | Midwest & Mid-Atlantic |
| EPI_ISL_11628221 | GISAID_170_NA_Outbreak | 02/17/2022 | Chicken                    | USA         | USA           | Maine          | Northeastern_USA       |
| EPI_ISL_11628222 | GISAID_170_NA_Outbreak | 02/21/2022 | Chicken                    | USA         | USA           | Delaware       | Northeastern_USA       |
| EPI_ISL_11628223 | GISAID_170_NA_Outbreak | 02/21/2022 | Chicken                    | USA         | USA           | Delaware       | Northeastern_USA       |
| EPI_ISL_11628224 | GISAID_170_NA_Outbreak | 02/21/2022 | Chicken                    | USA         | USA           | Delaware       | Northeastern_USA       |

|                  |                        |            |             |     |     |              |                        |
|------------------|------------------------|------------|-------------|-----|-----|--------------|------------------------|
| EPI_ISL_11628225 | GISAID_170_NA_Outbreak | 02/16/2022 | Turkey      | USA | USA | Indiana      | Midwest & Mid-Atlantic |
| EPI_ISL_11628226 | GISAID_170_NA_Outbreak | 02/16/2022 | Turkey      | USA | USA | Indiana      | Midwest & Mid-Atlantic |
| EPI_ISL_11628227 | GISAID_170_NA_Outbreak | 02/18/2022 | Turkey      | USA | USA | Indiana      | Midwest & Mid-Atlantic |
| EPI_ISL_11628228 | GISAID_170_NA_Outbreak | 02/18/2022 | Turkey      | USA | USA | Indiana      | Midwest & Mid-Atlantic |
| EPI_ISL_11628229 | GISAID_170_NA_Outbreak | 02/22/2022 | Turkey      | USA | USA | Michigan     | Upper_Midwest_USA      |
| EPI_ISL_11628230 | GISAID_170_NA_Outbreak | 02/22/2022 | Chicken     | USA | USA | Michigan     | Upper_Midwest_USA      |
| EPI_ISL_11628231 | GISAID_170_NA_Outbreak | 02/22/2022 | Guinea_fowl | USA | USA | Michigan     | Upper_Midwest_USA      |
| EPI_ISL_11628232 | GISAID_170_NA_Outbreak | 02/20/2022 | Chicken     | USA | USA | Maine        | Northeastern_USA       |
| EPI_ISL_11628233 | GISAID_170_NA_Outbreak | 02/22/2022 | Pheasant    | USA | USA | New_York     | Northeastern_USA       |
| EPI_ISL_11628234 | GISAID_170_NA_Outbreak | 02/22/2022 | Pheasant    | USA | USA | New_York     | Northeastern_USA       |
| EPI_ISL_11628235 | GISAID_170_NA_Outbreak | 02/21/2022 | Turkey      | USA | USA | Indiana      | Midwest & Mid-Atlantic |
| EPI_ISL_11628236 | GISAID_170_NA_Outbreak | 02/21/2022 | Turkey      | USA | USA | Indiana      | Midwest & Mid-Atlantic |
| EPI_ISL_11628237 | GISAID_170_NA_Outbreak | 02/21/2022 | Turkey      | USA | USA | Indiana      | Midwest & Mid-Atlantic |
| EPI_ISL_11628238 | GISAID_170_NA_Outbreak | 02/28/2022 | Chicken     | USA | USA | Iowa         | Upper_Midwest_USA      |
| EPI_ISL_11628239 | GISAID_170_NA_Outbreak | 02/28/2022 | Chicken     | USA | USA | Connecticut  | Northeastern_USA       |
| EPI_ISL_11628240 | GISAID_170_NA_Outbreak | 02/28/2022 | Turkey      | USA | USA | Indiana      | Midwest & Mid-Atlantic |
| EPI_ISL_11628241 | GISAID_170_NA_Outbreak | 02/28/2022 | Turkey      | USA | USA | Indiana      | Midwest & Mid-Atlantic |
| EPI_ISL_11628242 | GISAID_170_NA_Outbreak | 03/01/2022 | Turkey      | USA | USA | Indiana      | Midwest & Mid-Atlantic |
| EPI_ISL_11628243 | GISAID_170_NA_Outbreak | 03/01/2022 | Turkey      | USA | USA | Indiana      | Midwest & Mid-Atlantic |
| EPI_ISL_11628244 | GISAID_170_NA_Outbreak | 03/02/2022 | Chicken     | USA | USA | Missouri     | Midwest & Mid-Atlantic |
| EPI_ISL_11628245 | GISAID_170_NA_Outbreak | 03/02/2022 | Chicken     | USA | USA | Missouri     | Midwest & Mid-Atlantic |
| EPI_ISL_11628246 | GISAID_170_NA_Outbreak | 03/03/2022 | Chicken     | USA | USA | Maryland     | Northeastern_USA       |
| EPI_ISL_11628247 | GISAID_170_NA_Outbreak | 03/03/2022 | Chicken     | USA | USA | Maryland     | Northeastern_USA       |
| EPI_ISL_11628248 | GISAID_170_NA_Outbreak | 03/03/2022 | Chicken     | USA | USA | Missouri     | Midwest & Mid-Atlantic |
| EPI_ISL_11628249 | GISAID_170_NA_Outbreak | 03/04/2022 | Turkey      | USA | USA | South_Dakota | North Rockies & Plains |
| EPI_ISL_11628250 | GISAID_170_NA_Outbreak | 03/04/2022 | Turkey      | USA | USA | South_Dakota | North Rockies & Plains |
| EPI_ISL_11628251 | GISAID_170_NA_Outbreak | 03/06/2022 | Turkey      | USA | USA | Iowa         | Upper_Midwest_USA      |
| EPI_ISL_11628252 | GISAID_170_NA_Outbreak | 03/06/2022 | Turkey      | USA | USA | Iowa         | Upper_Midwest_USA      |
| EPI_ISL_11897507 | GISAID_170_NA_Outbreak | 03/03/2022 | Chicken     | USA | USA | Maryland     | Northeastern_USA       |
| EPI_ISL_11897508 | GISAID_170_NA_Outbreak | 03/03/2022 | Chicken     | USA | USA | Maryland     | Northeastern_USA       |
| EPI_ISL_11897667 | GISAID_170_NA_Outbreak | 03/03/2022 | Chicken     | USA | USA | Missouri     | Midwest & Mid-Atlantic |
| EPI_ISL_11897668 | GISAID_170_NA_Outbreak | 03/04/2022 | Turkey      | USA | USA | South_Dakota | North Rockies & Plains |
| EPI_ISL_11897669 | GISAID_170_NA_Outbreak | 03/04/2022 | Turkey      | USA | USA | South_Dakota | North Rockies & Plains |
| EPI_ISL_11897670 | GISAID_170_NA_Outbreak | 03/06/2022 | Turkey      | USA | USA | Iowa         | Upper_Midwest_USA      |
| EPI_ISL_11897671 | GISAID_170_NA_Outbreak | 03/06/2022 | Turkey      | USA | USA | Iowa         | Upper_Midwest_USA      |
| EPI_ISL_11897672 | GISAID_170_NA_Outbreak | 03/07/2022 | Turkey      | USA | USA | Missouri     | Midwest & Mid-Atlantic |
| EPI_ISL_11897673 | GISAID_170_NA_Outbreak | 03/07/2022 | Chicken     | USA | USA | Delaware     | Northeastern_USA       |
| EPI_ISL_11897674 | GISAID_170_NA_Outbreak | 03/07/2022 | Chicken     | USA | USA | Delaware     | Northeastern_USA       |
| EPI_ISL_11897675 | GISAID_170_NA_Outbreak | 03/04/2022 | Chicken     | USA | USA | Maryland     | Northeastern_USA       |
| EPI_ISL_11897676 | GISAID_170_NA_Outbreak | 03/07/2022 | Chicken     | USA | USA | Maryland     | Northeastern_USA       |
| EPI_ISL_11897677 | GISAID_170_NA_Outbreak | 03/08/2022 | Turkey      | USA | USA | Missouri     | Midwest & Mid-Atlantic |
| EPI_ISL_11897678 | GISAID_170_NA_Outbreak | 03/08/2022 | Turkey      | USA | USA | Missouri     | Midwest & Mid-Atlantic |
| EPI_ISL_11897679 | GISAID_170_NA_Outbreak | 03/08/2022 | Chicken     | USA | USA | Maryland     | Northeastern_USA       |
| EPI_ISL_11897680 | GISAID_170_NA_Outbreak | 03/08/2022 | Chicken     | USA | USA | Maryland     | Northeastern_USA       |
| EPI_ISL_11897681 | GISAID_170_NA_Outbreak | 03/10/2022 | Chicken     | USA | USA | Iowa         | Upper_Midwest_USA      |

|                  |                        |            |             |     |     |               |                        |
|------------------|------------------------|------------|-------------|-----|-----|---------------|------------------------|
| EPI_ISL_11897682 | GISAID_170_NA_Outbreak | 03/10/2022 | Chicken     | USA | USA | Iowa          | Upper_Midwest_USA      |
| EPI_ISL_11897683 | GISAID_170_NA_Outbreak | 03/09/2022 | Guinea_fowl | USA | USA | Illinois      | Midwest & Mid-Atlantic |
| EPI_ISL_11897684 | GISAID_170_NA_Outbreak | 03/09/2022 | Chicken     | USA | USA | Kansas        | Midwest & Mid-Atlantic |
| EPI_ISL_11897685 | GISAID_170_NA_Outbreak | 03/09/2022 | Chicken     | USA | USA | Kansas        | Midwest & Mid-Atlantic |
| EPI_ISL_11897686 | GISAID_170_NA_Outbreak | 03/10/2022 | Turkey      | USA | USA | Maine         | Northeastern_USA       |
| EPI_ISL_11897687 | GISAID_170_NA_Outbreak | 03/10/2022 | Chicken     | USA | USA | Maine         | Northeastern_USA       |
| EPI_ISL_11897688 | GISAID_170_NA_Outbreak | 03/11/2022 | Turkey      | USA | USA | South_Dakota  | North Rockies & Plains |
| EPI_ISL_11897689 | GISAID_170_NA_Outbreak | 03/11/2022 | Turkey      | USA | USA | South_Dakota  | North Rockies & Plains |
| EPI_ISL_11897690 | GISAID_170_NA_Outbreak | 03/13/2022 | Chicken     | USA | USA | Wisconsin     | Upper_Midwest_USA      |
| EPI_ISL_11897691 | GISAID_170_NA_Outbreak | 03/13/2022 | Chicken     | USA | USA | Wisconsin     | Upper_Midwest_USA      |
| EPI_ISL_11897692 | GISAID_170_NA_Outbreak | 03/11/2022 | Chicken     | USA | USA | Maine         | Northeastern_USA       |
| EPI_ISL_11897693 | GISAID_170_NA_Outbreak | 03/14/2022 | Chicken     | USA | USA | Missouri      | Midwest & Mid-Atlantic |
| EPI_ISL_11897694 | GISAID_170_NA_Outbreak | 03/14/2022 | Chicken     | USA | USA | Missouri      | Midwest & Mid-Atlantic |
| EPI_ISL_11897695 | GISAID_170_NA_Outbreak | 03/14/2022 | Chicken     | USA | USA | Nebraska      | North Rockies & Plains |
| EPI_ISL_11897696 | GISAID_170_NA_Outbreak | 03/14/2022 | Waterfowl   | USA | USA | Nebraska      | North Rockies & Plains |
| EPI_ISL_11897697 | GISAID_170_NA_Outbreak | 03/15/2022 | Turkey      | USA | USA | New_Hampshire | Northeastern_USA       |
| EPI_ISL_11897698 | GISAID_170_NA_Outbreak | 03/16/2022 | Chicken     | USA | USA | Delaware      | Northeastern_USA       |
| EPI_ISL_11897699 | GISAID_170_NA_Outbreak | 03/16/2022 | Chicken     | USA | USA | Delaware      | Northeastern_USA       |
| EPI_ISL_11897700 | GISAID_170_NA_Outbreak | 03/15/2022 | Guinea_fowl | USA | USA | Maine         | Northeastern_USA       |
| EPI_ISL_11897701 | GISAID_170_NA_Outbreak | 03/15/2022 | Chicken     | USA | USA | Maine         | Northeastern_USA       |
| EPI_ISL_11897702 | GISAID_170_NA_Outbreak | 03/16/2022 | Duck        | USA | USA | Kansas        | Midwest & Mid-Atlantic |
| EPI_ISL_11897703 | GISAID_170_NA_Outbreak | 03/16/2022 | Chicken     | USA | USA | Kansas        | Midwest & Mid-Atlantic |
| EPI_ISL_11897704 | GISAID_170_NA_Outbreak | 03/17/2022 | Chicken     | USA | USA | Iowa          | Upper_Midwest_USA      |
| EPI_ISL_11971464 | GISAID_170_NA_Outbreak | 03/17/2022 | Turkey      | USA | USA | South_Dakota  | North Rockies & Plains |
| EPI_ISL_11971465 | GISAID_170_NA_Outbreak | 03/17/2022 | Turkey      | USA | USA | South_Dakota  | North Rockies & Plains |
| EPI_ISL_11971466 | GISAID_170_NA_Outbreak | 03/17/2022 | Turkey      | USA | USA | South_Dakota  | North Rockies & Plains |
| EPI_ISL_11971467 | GISAID_170_NA_Outbreak | 03/17/2022 | Turkey      | USA | USA | South_Dakota  | North Rockies & Plains |
| EPI_ISL_11971468 | GISAID_170_NA_Outbreak | 03/16/2022 | Chicken     | USA | USA | Kansas        | Midwest & Mid-Atlantic |
| EPI_ISL_11971469 | GISAID_170_NA_Outbreak | 03/16/2022 | Chicken     | USA | USA | Kansas        | Midwest & Mid-Atlantic |
| EPI_ISL_11971470 | GISAID_170_NA_Outbreak | 03/18/2022 | Chicken     | USA | USA | Maine         | Northeastern_USA       |
| EPI_ISL_11971471 | GISAID_170_NA_Outbreak | 03/18/2022 | Chicken     | USA | USA | Maine         | Northeastern_USA       |
| EPI_ISL_11971472 | GISAID_170_NA_Outbreak | 03/18/2022 | Turkey      | USA | USA | Maine         | Northeastern_USA       |
| EPI_ISL_11971475 | GISAID_170_NA_Outbreak | 03/19/2022 | Chicken     | USA | USA | Iowa          | Upper_Midwest_USA      |
| EPI_ISL_11971476 | GISAID_170_NA_Outbreak | 03/19/2022 | Chicken     | USA | USA | Iowa          | Upper_Midwest_USA      |
| EPI_ISL_11971477 | GISAID_170_NA_Outbreak | 03/21/2022 | Chicken     | USA | USA | Nebraska      | North Rockies & Plains |
| EPI_ISL_11971478 | GISAID_170_NA_Outbreak | 03/21/2022 | Turkey      | USA | USA | South_Dakota  | North Rockies & Plains |
| EPI_ISL_11971479 | GISAID_170_NA_Outbreak | 03/21/2022 | Turkey      | USA | USA | South_Dakota  | North Rockies & Plains |
| EPI_ISL_11971480 | GISAID_170_NA_Outbreak | 03/21/2022 | Turkey      | USA | USA | South_Dakota  | North Rockies & Plains |
| EPI_ISL_11971481 | GISAID_170_NA_Outbreak | 03/21/2022 | Turkey      | USA | USA | South_Dakota  | North Rockies & Plains |
| EPI_ISL_11971482 | GISAID_170_NA_Outbreak | 03/21/2022 | Turkey      | USA | USA | South_Dakota  | North Rockies & Plains |
| EPI_ISL_11971483 | GISAID_170_NA_Outbreak | 03/22/2022 | Chicken     | USA | USA | Maine         | Northeastern_USA       |
| EPI_ISL_11971484 | GISAID_170_NA_Outbreak | 03/22/2022 | Turkey      | USA | USA | South_Dakota  | North Rockies & Plains |
| EPI_ISL_11971485 | GISAID_170_NA_Outbreak | 03/22/2022 | Turkey      | USA | USA | South_Dakota  | North Rockies & Plains |
| EPI_ISL_11971486 | GISAID_170_NA_Outbreak | 03/22/2022 | Chicken     | USA | USA | South_Dakota  | North Rockies & Plains |
| EPI_ISL_11971487 | GISAID_170_NA_Outbreak | 03/22/2022 | Chicken     | USA | USA | South_Dakota  | North Rockies & Plains |

|                  |                        |            |                     |     |     |              |                        |
|------------------|------------------------|------------|---------------------|-----|-----|--------------|------------------------|
| EPI_ISL_11971488 | GISAID_170_NA_Outbreak | 03/22/2022 | Turkey              | USA | USA | South_Dakota | North Rockies & Plains |
| EPI_ISL_11971489 | GISAID_170_NA_Outbreak | 03/22/2022 | Turkey              | USA | USA | South_Dakota | North Rockies & Plains |
| EPI_ISL_11971490 | GISAID_170_NA_Outbreak | 03/22/2022 | Pheasant            | USA | USA | New_York     | Northeastern_USA       |
| EPI_ISL_11971491 | GISAID_170_NA_Outbreak | 03/22/2022 | Mallard             | USA | USA | New_York     | Northeastern_USA       |
| EPI_ISL_11971492 | GISAID_170_NA_Outbreak | 03/23/2022 | Turkey              | USA | USA | Iowa         | Upper_Midwest_USA      |
| EPI_ISL_11971493 | GISAID_170_NA_Outbreak | 03/23/2022 | Turkey              | USA | USA | South_Dakota | North Rockies & Plains |
| EPI_ISL_11971494 | GISAID_170_NA_Outbreak | 03/23/2022 | Turkey              | USA | USA | South_Dakota | North Rockies & Plains |
| EPI_ISL_11971495 | GISAID_170_NA_Outbreak | 03/22/2022 | Duck                | USA | USA | Michigan     | Upper_Midwest_USA      |
| EPI_ISL_11971496 | GISAID_170_NA_Outbreak | 03/22/2022 | Goose               | USA | USA | Michigan     | Upper_Midwest_USA      |
| EPI_ISL_11971497 | GISAID_170_NA_Outbreak | 03/22/2022 | Chicken             | USA | USA | Michigan     | Upper_Midwest_USA      |
| EPI_ISL_11971498 | GISAID_170_NA_Outbreak | 03/22/2022 | Turkey              | USA | USA | Michigan     | Upper_Midwest_USA      |
| EPI_ISL_11971499 | GISAID_170_NA_Outbreak | 03/23/2022 | Chicken             | USA | USA | Nebraska     | North Rockies & Plains |
| EPI_ISL_11971500 | GISAID_170_NA_Outbreak | 03/24/2022 | Turkey              | USA | USA | South_Dakota | North Rockies & Plains |
| EPI_ISL_11971501 | GISAID_170_NA_Outbreak | 03/24/2022 | Turkey              | USA | USA | South_Dakota | North Rockies & Plains |
| EPI_ISL_11971502 | GISAID_170_NA_Outbreak | 03/25/2022 | Pheasant            | USA | USA | New_York     | Northeastern_USA       |
| EPI_ISL_12567390 | GISAID_170_NA_Outbreak | 03/17/2022 | Chicken             | USA | USA | Maryland     | Northeastern_USA       |
| EPI_ISL_12567391 | GISAID_170_NA_Outbreak | 03/25/2022 | Chicken             | USA | USA | Iowa         | Upper_Midwest_USA      |
| EPI_ISL_12567392 | GISAID_170_NA_Outbreak | 03/25/2022 | Chicken             | USA | USA | Iowa         | Upper_Midwest_USA      |
| EPI_ISL_12567393 | GISAID_170_NA_Outbreak | 03/25/2022 | Chicken             | USA | USA | Minnesota    | Upper_Midwest_USA      |
| EPI_ISL_12567529 | GISAID_170_NA_Outbreak | 03/25/2022 | Embden_goose        | USA | USA | Minnesota    | Upper_Midwest_USA      |
| EPI_ISL_12567530 | GISAID_170_NA_Outbreak | 03/25/2022 | Turkey              | USA | USA | Minnesota    | Upper_Midwest_USA      |
| EPI_ISL_12567531 | GISAID_170_NA_Outbreak | 03/25/2022 | Turkey              | USA | USA | Minnesota    | Upper_Midwest_USA      |
| EPI_ISL_12567532 | GISAID_170_NA_Outbreak | 03/24/2022 | Duck                | USA | USA | Nebraska     | North Rockies & Plains |
| EPI_ISL_12567533 | GISAID_170_NA_Outbreak | 03/24/2022 | Chicken             | USA | USA | Nebraska     | North Rockies & Plains |
| EPI_ISL_12690318 | GISAID_170_NA_Outbreak | 03/25/2022 | Chicken             | USA | USA | Missouri     | Midwest & Mid-Atlantic |
| EPI_ISL_12690319 | GISAID_170_NA_Outbreak | 03/25/2022 | Duck                | USA | USA | Missouri     | Midwest & Mid-Atlantic |
| EPI_ISL_12690320 | GISAID_170_NA_Outbreak | 03/25/2022 | Chicken             | USA | USA | South_Dakota | North Rockies & Plains |
| EPI_ISL_12690321 | GISAID_170_NA_Outbreak | 03/25/2022 | Guinea_fowl         | USA | USA | South_Dakota | North Rockies & Plains |
| EPI_ISL_12690322 | GISAID_170_NA_Outbreak | 03/26/2022 | Turkey              | USA | USA | Minnesota    | Upper_Midwest_USA      |
| EPI_ISL_12690323 | GISAID_170_NA_Outbreak | 03/26/2022 | Turkey              | USA | USA | Minnesota    | Upper_Midwest_USA      |
| EPI_ISL_12690324 | GISAID_170_NA_Outbreak | 03/26/2022 | Turkey              | USA | USA | South_Dakota | North Rockies & Plains |
| EPI_ISL_12690325 | GISAID_170_NA_Outbreak | 03/26/2022 | Turkey              | USA | USA | South_Dakota | North Rockies & Plains |
| EPI_ISL_12690568 | GISAID_170_NA_Outbreak | 03/26/2022 | Turkey              | USA | USA | South_Dakota | North Rockies & Plains |
| EPI_ISL_12690569 | GISAID_170_NA_Outbreak | 03/27/2022 | Turkey              | USA | USA | Iowa         | Upper_Midwest_USA      |
| EPI_ISL_12690570 | GISAID_170_NA_Outbreak | 03/28/2022 | Turkey              | USA | USA | Iowa         | Upper_Midwest_USA      |
| EPI_ISL_12690571 | GISAID_170_NA_Outbreak | 03/28/2022 | Turkey              | USA | USA | Iowa         | Upper_Midwest_USA      |
| EPI_ISL_12690589 | GISAID_170_NA_Outbreak | 03/28/2022 | Chicken             | USA | USA | Iowa         | Upper_Midwest_USA      |
| EPI_ISL_12690590 | GISAID_170_NA_Outbreak | 03/28/2022 | Chicken             | USA | USA | Iowa         | Upper_Midwest_USA      |
| EPI_ISL_12690591 | GISAID_170_NA_Outbreak | 03/28/2022 | Turkey              | USA | USA | Minnesota    | Upper_Midwest_USA      |
| EPI_ISL_12690903 | GISAID_170_NA_Outbreak | 03/28/2022 | Turkey              | USA | USA | Minnesota    | Upper_Midwest_USA      |
| EPI_ISL_12690904 | GISAID_170_NA_Outbreak | 03/28/2022 | Turkey              | USA | USA | Minnesota    | Upper_Midwest_USA      |
| EPI_ISL_12690905 | GISAID_170_NA_Outbreak | 03/28/2022 | Chicken             | USA | USA | New_York     | Northeastern_USA       |
| EPI_ISL_12690906 | GISAID_170_NA_Outbreak | 03/28/2022 | Duck                | USA | USA | New_York     | Northeastern_USA       |
| EPI_ISL_12690907 | GISAID_170_NA_Outbreak | 03/28/2022 | American_buff_goose | USA | USA | New_York     | Northeastern_USA       |
| EPI_ISL_12690908 | GISAID_170_NA_Outbreak | 03/28/2022 | Quail               | USA | USA | New_York     | Northeastern_USA       |



|                  |                        |            |                  |     |     |                |                        |
|------------------|------------------------|------------|------------------|-----|-----|----------------|------------------------|
| EPI_ISL_12690909 | GISAID_170_NA_Outbreak | 03/29/2022 | Chicken          | USA | USA | Wyoming        | North Rockies & Plains |
| EPI_ISL_12690910 | GISAID_170_NA_Outbreak | 03/27/2022 | Turkey           | USA | USA | South_Dakota   | North Rockies & Plains |
| EPI_ISL_12690911 | GISAID_170_NA_Outbreak | 03/27/2022 | Turkey           | USA | USA | South_Dakota   | North Rockies & Plains |
| EPI_ISL_12690912 | GISAID_170_NA_Outbreak | 03/28/2022 | Turkey           | USA | USA | Minnesota      | Upper_Midwest_USA      |
| EPI_ISL_12691028 | GISAID_170_NA_Outbreak | 03/27/2022 | Turkey           | USA | USA | South_Dakota   | North Rockies & Plains |
| EPI_ISL_12691029 | GISAID_170_NA_Outbreak | 03/27/2022 | Turkey           | USA | USA | South_Dakota   | North Rockies & Plains |
| EPI_ISL_12691030 | GISAID_170_NA_Outbreak | 03/28/2022 | Turkey           | USA | USA | South_Dakota   | North Rockies & Plains |
| EPI_ISL_12691031 | GISAID_170_NA_Outbreak | 03/28/2022 | Turkey           | USA | USA | South_Dakota   | North Rockies & Plains |
| EPI_ISL_12691032 | GISAID_170_NA_Outbreak | 03/27/2022 | Turkey           | USA | USA | North_Carolina | Midwest & Mid-Atlantic |
| EPI_ISL_12691033 | GISAID_170_NA_Outbreak | 03/27/2022 | Turkey           | USA | USA | North_Carolina | Midwest & Mid-Atlantic |
| EPI_ISL_12691034 | GISAID_170_NA_Outbreak | 03/28/2022 | Goose            | USA | USA | North_Dakota   | North Rockies & Plains |
| EPI_ISL_12691035 | GISAID_170_NA_Outbreak | 03/28/2022 | Chicken          | USA | USA | North_Dakota   | North Rockies & Plains |
| EPI_ISL_12693855 | GISAID_170_NA_Outbreak | 03/31/2022 | Chicken          | USA | USA | Iowa           | Upper_Midwest_USA      |
| EPI_ISL_16641778 | Runstadler Lab, Tufts  | 03/03/2022 | Great_horned_owl | USA | USA | Massachusetts  | Northeastern_USA       |
| EPI_ISL_16641764 | Runstadler Lab, Tufts  | 03/01/2022 | Sanderling       | USA | USA | Massachusetts  | Northeastern_USA       |
| EPI_ISL_16641765 | Runstadler Lab, Tufts  | 03/02/2022 | Sanderling       | USA | USA | Massachusetts  | Northeastern_USA       |
| EPI_ISL_16641766 | Runstadler Lab, Tufts  | 03/06/2022 | Sanderling       | USA | USA | Massachusetts  | Northeastern_USA       |
| EPI_ISL_16641767 | Runstadler Lab, Tufts  | 03/06/2022 | Red_tailed_hawk  | USA | USA | Massachusetts  | Northeastern_USA       |
| EPI_ISL_16641768 | Runstadler Lab, Tufts  | 03/06/2022 | Sanderling       | USA | USA | Massachusetts  | Northeastern_USA       |
| EPI_ISL_16641769 | Runstadler Lab, Tufts  | 03/07/2022 | Sanderling       | USA | USA | Massachusetts  | Northeastern_USA       |
| EPI_ISL_16641770 | Runstadler Lab, Tufts  | 03/07/2022 | Herring_gull     | USA | USA | Massachusetts  | Northeastern_USA       |
| EPI_ISL_16641771 | Runstadler Lab, Tufts  | 03/15/2022 | American_crow    | USA | USA | Massachusetts  | Northeastern_USA       |
| EPI_ISL_16641772 | Runstadler Lab, Tufts  | 03/15/2022 | American_crow    | USA | USA | Massachusetts  | Northeastern_USA       |
| EPI_ISL_16641773 | Runstadler Lab, Tufts  | 03/16/2022 | American_crow    | USA | USA | Massachusetts  | Northeastern_USA       |
| EPI_ISL_16641774 | Runstadler Lab, Tufts  | 03/18/2022 | Sanderling       | USA | USA | Massachusetts  | Northeastern_USA       |
| EPI_ISL_16641775 | Runstadler Lab, Tufts  | 03/09/2022 | American_crow    | USA | USA | Massachusetts  | Northeastern_USA       |
| EPI_ISL_16641776 | Runstadler Lab, Tufts  | 03/03/2022 | Sanderling       | USA | USA | Massachusetts  | Northeastern_USA       |
| EPI_ISL_16641777 | Runstadler Lab, Tufts  | 03/02/2022 | Sanderling       | USA | USA | Massachusetts  | Northeastern_USA       |

**Supplementary figure S1:** 95% Highest Posterior Density Tree of phylogeographic transitions between geographic regions.

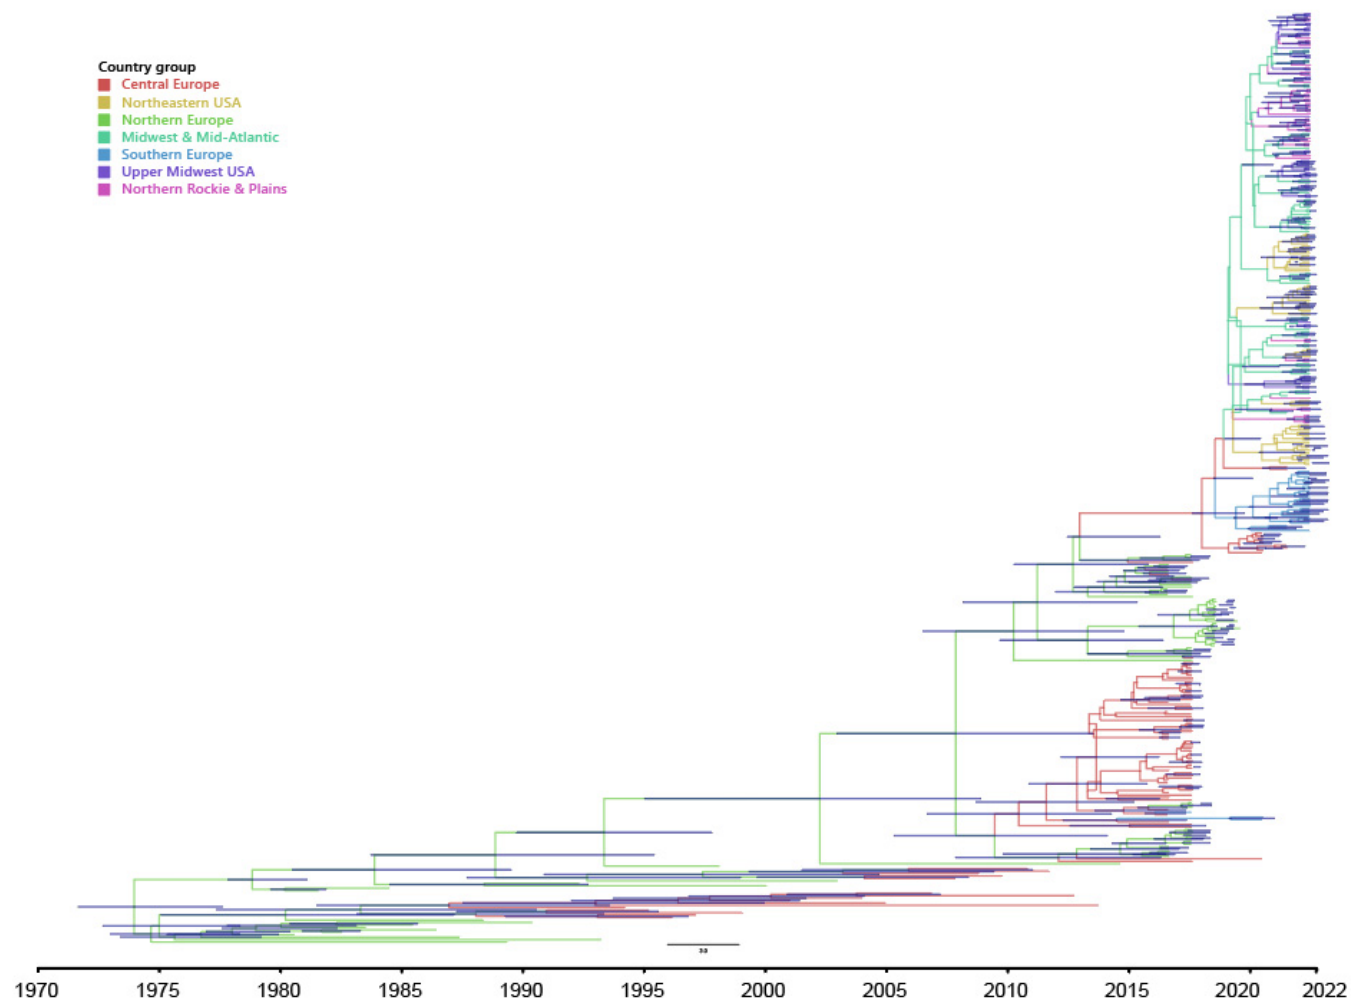

**Supplementary table S2:** Statistically supported transitions between geographic regions. Only BF<sub>s</sub> > 3 with corresponding posterior probability (PP) estimates > 0.5 are presented as statistically supported (noted in **bold**).

| <u>Origin</u>             | <u>Destination</u>        | <u>Mean transition rate (95% HPD)</u> | <u>Bayes Factor</u> | <u>Posterior probability</u> |
|---------------------------|---------------------------|---------------------------------------|---------------------|------------------------------|
| Northern Europe           | Central Europe            | 1.77 (0.49, 3.41)                     | 47475.674268        | <b>0.9998889012</b>          |
| Central Europe            | Southern Europe           | 0.70 (0.08, 1.54)                     | 2152.9498952        | <b>0.9975558271</b>          |
| Midwest & Mid-Atlantic    | Northern Rockies & Plains | 3.19 (0.84, 5.90)                     | 1526.3684523        | <b>0.9965559382</b>          |
| Midwest & Mid-Atlantic    | Upper Midwest USA         | 2.88 (0.69, 5.46)                     | 858.01491314        | <b>0.9938895678</b>          |
| Midwest & Mid-Atlantic    | Northeast USA             | 1.18 (0.21, 1.46)                     | 692.97418013        | <b>0.9924452839</b>          |
| Central Europe            | Midwest & Mid-Atlantic    | 0.39 (0.01, 1.04)                     | 76.307312269        | <b>0.9353405177</b>          |
| Central Europe            | Northern Europe           | 0.67 (0.01, 1.86)                     | 14.041828801        | <b>0.7269192312</b>          |
| Upper Midwest USA         | Northern Rockies & Plains | 1.12 (0.01, 2.94)                     | 12.861269368        | <b>0.7091434285</b>          |
| Northern Rockies & Plains | Upper Midwest USA         | 1.17 (0.01, 3.13)                     | 9.7362906657        | <b>0.6485946006</b>          |
| Northern Rockies & Plains | Midwest & Mid-Atlantic    | 0.92 (0.00, 2.72)                     | 4.7695515554        | 0.4748361293                 |
| Southern Europe           | Northern Europe           | 0.76 (0.00, 2.47)                     | 4.2078388707        | 0.4437284746                 |
| Upper Midwest USA         | Midwest & Mid-Atlantic    | 0.91 (0.00, 2.76)                     | 2.9824814888        | 0.3611820909                 |
| Northeast USA             | Northern Europe           | 0.94 (0.00, 2.96)                     | 1.3167547833        | 0.1997555827                 |
| Southern Europe           | Central Europe            | 0.94 (0.00, 2.99)                     | 1.2785412777        | 0.1950894345                 |
| Northern Rockies & Plains | Northern Europe           | 0.95 (0.00, 3.00)                     | 1.1998943085        | 0.185312743                  |
| Upper Midwest USA         | Northern Europe           | 0.96 (0.00, 3.07)                     | 1.1875559978        | 0.1837573603                 |
| Northern Rockies & Plains | Central Europe            | 0.94 (0.00, 3.00)                     | 1.1447397572        | 0.1783135207                 |
| Upper Midwest USA         | Central Europe            | 0.96 (0.00, 3.16)                     | 1.1257001343        | 0.1758693479                 |
| Northeast USA             | Central Europe            | 0.94 (0.00, 2.99)                     | 1.0430820132        | 0.1650927675                 |
| Southern Europe           | Midwest & Mid-Atlantic    | 0.98 (0.00, 3.06)                     | 0.9162080834        | 0.1479835574                 |
| Northeast USA             | Midwest & Mid-Atlantic    | 0.99 (0.00, 3.15)                     | 0.9025141189        | 0.1460948783                 |
| Southern Europe           | Northeast USA             | 1.00 (0.00, 3.11)                     | 0.7819411986        | 0.129096767                  |
| Northeast USA             | Northern Rockies & Plains | 0.98 (0.00, 3.04)                     | 0.7603832411        | 0.1259860016                 |
| Southern Europe           | Upper Midwest USA         | 0.99 (0.00, 3.08)                     | 0.741264329         | 0.1232085324                 |
| Southern Europe           | Northern Rockies & Plains | 1.00 (0.00, 3.07)                     | 0.741264329         | 0.1232085324                 |
| Northeast USA             | Southern Europe           | 1.00 (0.00, 3.12)                     | 0.7283325087        | 0.1213198533                 |
| Northeast USA             | Upper Midwest USA         | 0.99 (0.00, 3.06)                     | 0.7222661629        | 0.1204310632                 |
| Northern Rockies & Plains | Northeast USA             | 1.01 (0.00, 3.16)                     | 0.6667282778        | 0.1122097545                 |
| Northern Rockies & Plains | Southern Europe           | 1.00 (0.00, 3.07)                     | 0.6637555182        | 0.1117653594                 |
| Upper Midwest USA         | Southern Europe           | 1.00 (0.00, 3.13)                     | 0.647458366         | 0.1093211865                 |

|                        |                           |                   |              |              |
|------------------------|---------------------------|-------------------|--------------|--------------|
| Midwest & Mid-Atlantic | Northern Europe           | 0.99 (0.00, 3.03) | 0.6151309296 | 0.1044328408 |
| Upper Midwest USA      | Northeast USA             | 1.01 (0.00, 3.11) | 0.5773778538 | 0.0986557049 |
| Midwest & Mid-Atlantic | Central Europe            | 1.01 (0.00, 3.14) | 0.5159909849 | 0.089101211  |
| Central Europe         | Northeast USA             | 0.00 (0.00, 0.00) | 0.4572623194 | 0.0797689146 |
| Northern Europe        | Southern Europe           | 1.03 (0.00, 3.08) | 0.3706978926 | 0.0656593712 |
| Midwest & Mid-Atlantic | Southern Europe           | 1.02 (0.00, 3.10) | 0.3619842459 | 0.0642150872 |
| Central Europe         | Northern Rockies & Plains | 1.04 (0.00, 3.10) | 0.3036995312 | 0.0544383957 |
| Central Europe         | Upper Midwest USA         | 1.03 (0.00, 3.15) | 0.2795518178 | 0.0503277414 |
| Northern Europe        | Northern Rockies & Plains | 1.06 (0.00, 3.19) | 0.2691741872 | 0.0485501611 |
| Northern Europe        | Midwest & Mid-Atlantic    | 1.05 (0.00, 3.18) | 0.2678797093 | 0.0483279636 |
| Northern Europe        | Northeast USA             | 1.06 (0.00, 3.20) | 0.2530365428 | 0.0457726919 |
| Northern Europe        | Upper Midwest USA         | 0.99 (0.00, 3.06) | 0.2478923191 | 0.0448839018 |

**Supplementary Table S3:** Markov rewards, by region. The mean proportion of time viruses spend within each global region between 2016-2022.

| Region                    | Mean Markov Reward | % of total |
|---------------------------|--------------------|------------|
| Central Europe            | 225.57             | 30.0%      |
| Northeast USA             | 53.08              | 7.1%       |
| Northern Europe           | 246.46             | 32.8%      |
| Midwest & Mid-Atlantic    | 66.71              | 8.9%       |
| Southern Europe           | 76.63              | 10.2%      |
| Upper Midwest USA         | 38.25              | 5.1%       |
| Northern Rockies & Plains | 44.82              | 6.0%       |
| Total                     | 751.52             | 100        |

**Supplementary table S4.** Predictors of H5Nx clade 2.3.4.4 virus diffusion within Europe and North America, 2016-2022. Variables with Bayes factors (BF)  $\geq 3.0$  and posterior probabilities  $\geq 0.25$ , demonstrating statistical support, are in bold. HPD = Highest Posterior Density.

| Variable name                                | Median coefficient | Lower 95% HPD | Upper 95% HPD | Posterior probability | Bayes factor       |
|----------------------------------------------|--------------------|---------------|---------------|-----------------------|--------------------|
| Latitude destination                         | 1.214124377        | -0.585555202  | 2.407489937   | 0.02629737            | 0.687929993        |
| Northward movement                           | -1.829646159       | -4.451835532  | 0.119607249   | 0.075192481           | 2.071005859        |
| Precipitation origin                         | -0.956364177       | -2.64111988   | 2.33769531    | 0.079792021           | 2.208674595        |
| Precipitation change origin                  | -0.897593217       | -2.787697887  | 2.197879486   | 0.166283372           | 5.080291414        |
| Continent location USA destination           | 2.282530936        | 0.5945233     | 4.056957599   | 0.240375962           | 8.06028881         |
| <b>Distance btw centroids</b>                | -2.130355743       | -3.277900785  | -1.175432154  | 0.908609139           | <b>253.2401714</b> |
| <b>Latitude origin</b>                       | -2.320001931       | -3.767149297  | -0.84596672   | 0.325567443           | <b>12.29591093</b> |
| Precipitation change destination             | -0.678979138       | -1.115803299  | -0.222710759  | 0.161683832           | 4.912663491        |
| Precipitation destination                    | -0.589918783       | -1.268639864  | 0.112277783   | 0.050894911           | 1.365898158        |
| Samples origin                               | 0.282552543        | -1.541599376  | 1.887745797   | 0.00939906            | 0.241681806        |
| Continent location Europe origin             | -2.001425813       | -4.076301642  | -0.345651198  | 0.115588441           | 3.32903425         |
| <b>Continent location Europe destination</b> | -2.27184237        | -3.953716411  | -0.579292985  | 0.270272973           | <b>9.434099517</b> |
| Samples destination                          | 0.426434773        | 0.02754633    | 1.538648832   | 0.00639936            | 0.164052537        |
| Shared borders                               | 2.758213248        | -0.726980255  | 4.79373512    | 0.113288671           | 3.25433676         |
| Temperature origin                           | -0.331079252       | -3.695629007  | 3.667588749   | 0.123287671           | 3.581960579        |
| <b>Temperature change origin</b>             | -2.185978944       | -3.689385204  | -0.551772667  | 0.406459354           | <b>17.44315035</b> |
| <b>Temperature change destination</b>        | -1.248416065       | -1.904850985  | -0.564619541  | 0.267073293           | <b>9.281713948</b> |
| Temperature destination                      | -0.936217257       | -1.88072551   | 0.254658779   | 0.03139686            | 0.825654999        |
| <b>Continent location USA origin</b>         | 0.928503881        | 0.225287933   | 1.673362863   | 0.8615                | <b>6.220216606</b> |
